# Supplementary material for: Mesoporous silica nanoparticles functionalized with fluorescent and MRI reporters for the visualization of murine tumors overexpressing αvβ3receptors
Source: Royal Society of Chemistry journal article supplement (doi:10.1039/c5nr08878j), 2016-01-01
Supplement: c5nr08878j1.pdf [file c5nr08878j1.pdf]

# Mesoporous silica nanoparticles functionalized with Fluorescent and MRI reporters for the visualization of murine tumors overexpressing $\alpha_v\beta_3$ receptors

*He Hu, Francesca Arena, Eliana Gianolio, Cinzia Boffa, Enza Di Gregorio, Rachele*

*Stefania, Laura Orio, Simona Baroni and Silvio Aime\**

*Corresponding author: Prof. Silvio Aime, email: [silvio.aime@unito.it](mailto:silvio.aime@unito.it)*

Department of Molecular Biotechnologies and Health Sciences, University of Torino,  
Torino (IT)

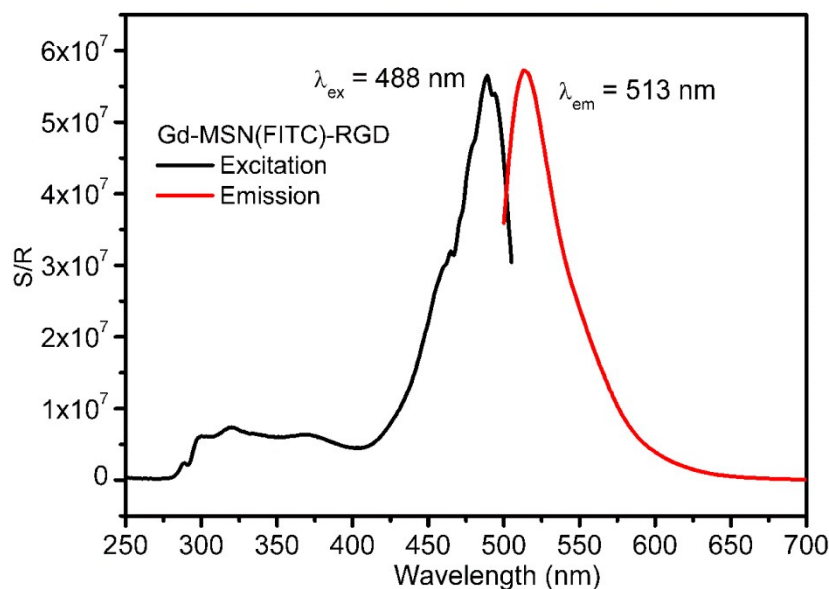

Figure S1. The room-temperature (R.T.) absorption and emission spectra of Gd-MSNs-RGD in aqueous solution with concentration of 50  $\mu\text{g/mL}$ .

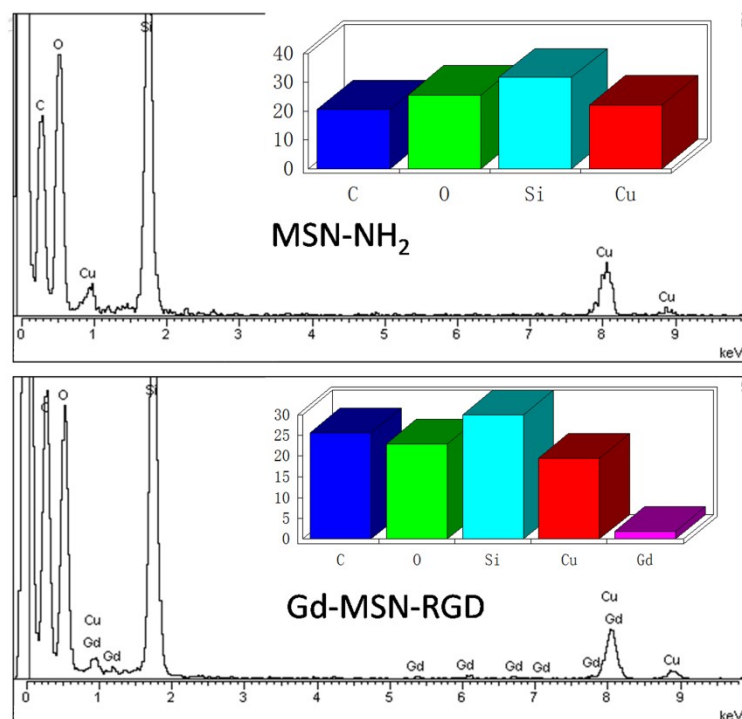

Figure S2. The Energy dispersive x-ray analysis (EDXA) spectrum of original MSNs-NH<sub>2</sub> and final nanoprobe Gd-MSNs-RGD obtained during TEM observation.

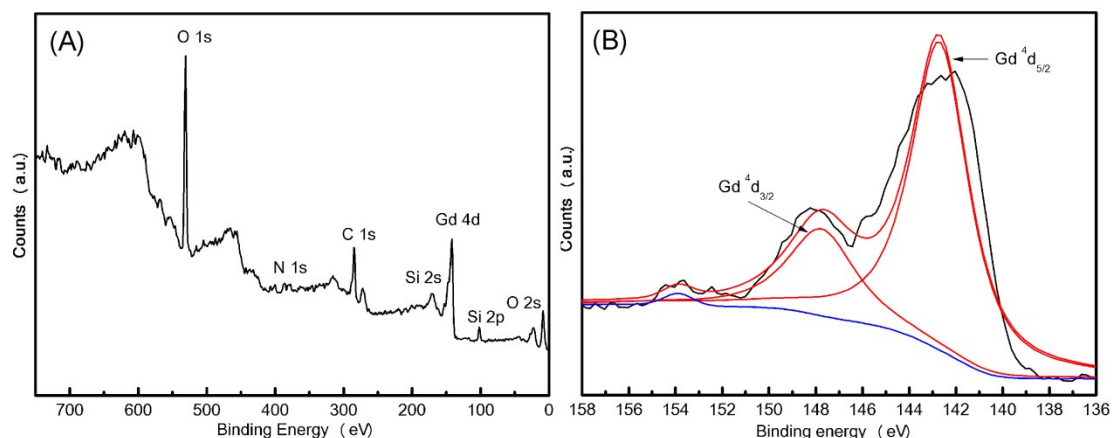

Figure S3. The XPS wide-scan and high-resolution spectra of Gd-MSNs-RGD nanoprobe.

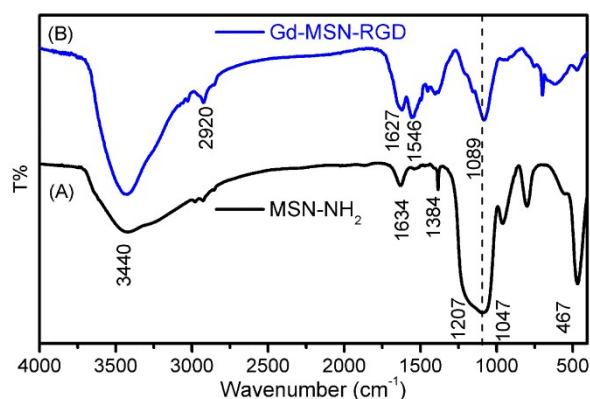

Figure S4. The FTIR of MSNs-NH<sub>2</sub> and Gd-MSNs-RGD.

The strong and broad band in the range of 1207 ~1047 cm<sup>-1</sup> and a relative weak peak at 460 cm<sup>-1</sup>, corresponding to the Si-O-Si asymmetric ( $\nu_{as}$ ) stretching vibration from the SiO<sub>2</sub> matrix. The characteristic absorption peak at 1634 cm<sup>-1</sup> can be assigned to N-H deformation vibrations. The characteristic bond of amino groups should be at 3200 cm<sup>-1</sup> that may be covered by the strong absorption of H-O and Si-O vibration. After further reaction with Mal-PEG27-NSH, the new peaks at  $\nu$  = 1546 and 1627 cm<sup>-1</sup> attributed to the vibration of imide-bond appear in Figure S3B, and the sharp peak at 1089 cm<sup>-1</sup> belongs to the C-O-C stretching vibration from the PEG chains, thus corroborating successful synthesis of the Gd-MSNs-RGD by this strategy.

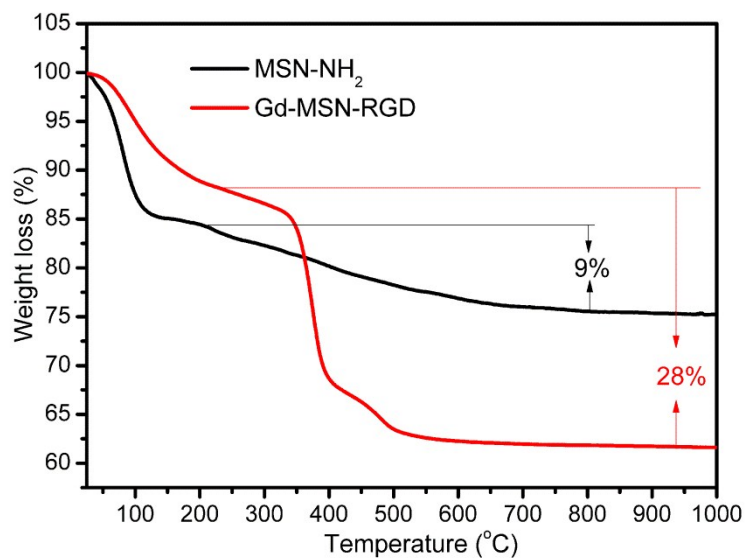

Figure S5. Thermal gravimetric analysis (TGA) of MSNs-NH<sub>2</sub> and Gd-MSNs-RGD.

The early weight loss at temperatures below 150 °C is seen from TGA curve due to loosely bound water, followed by a steady weight loss from about 300 to 550 °C were mainly due to the decompositions of organics (aminopropyl groups and PEG chains). The organics content of MSNs-NH<sub>2</sub> and Gd-MSNs-RGD is 9 % and 28 % respectively. The conjugated Gd<sup>3+</sup>-DOTAGA, PEG and RGD was about 19 % according to the TGA data.

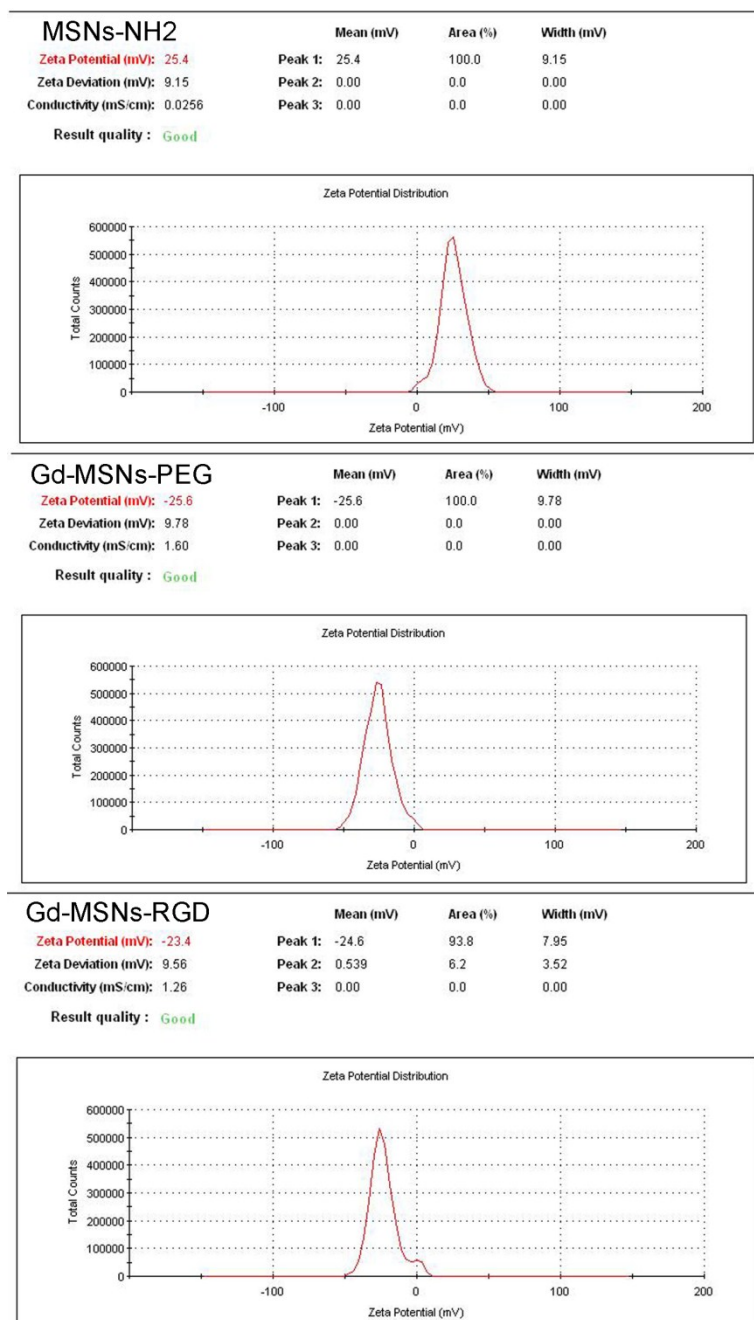

Figure S6. The zeta-potential of MSNs-NH<sub>2</sub>, Gd-MSNs-PEG and Gd-MSNs-RGD in PBS buffer at neutral pH monitored after each functional process.

**Calculation of the graft density of -NH<sub>2</sub> and final RGD on the surface of MSNs-NH<sub>2</sub> and**

**Gd-MSNs-RGD:**

The density of grafted -NH<sub>2</sub> is expressed as  $d_{\text{NH}_2}$ . It was determined as follows:

$$d_{\text{NH}_2} = \frac{\text{amount of NH}_2 \text{ (mol g}^{-1}\text{)} \times m_{\text{MSN}} \times N_A}{S_{\text{MSN}}}, \text{ (equation 1)}$$

Where the  $N_A$  is the Avogadro constant,  $m_{MSN}$  is the mass of each MSN:

$$m_{MSN} = \rho_{SiO_2} \times \frac{4\pi r^3}{3}, \text{ (equation 2)}$$

The  $\rho_{SiO_2}$  is density of silica, and  $r$  is the radius of MSNs as obtained from the TEM image,

The  $S_{MSN}$  is the surface area of each MSN ( $4\pi r^2$ ) (equation 3)

By substituting Eq.2 and Eq.3 into Eq.1, one obtains:

$$d_{NH_2} = \frac{\text{amount of } NH_2 \text{ (mol } g^{-1}) \times \rho_{SiO_2} \times r \times N_A}{3}$$

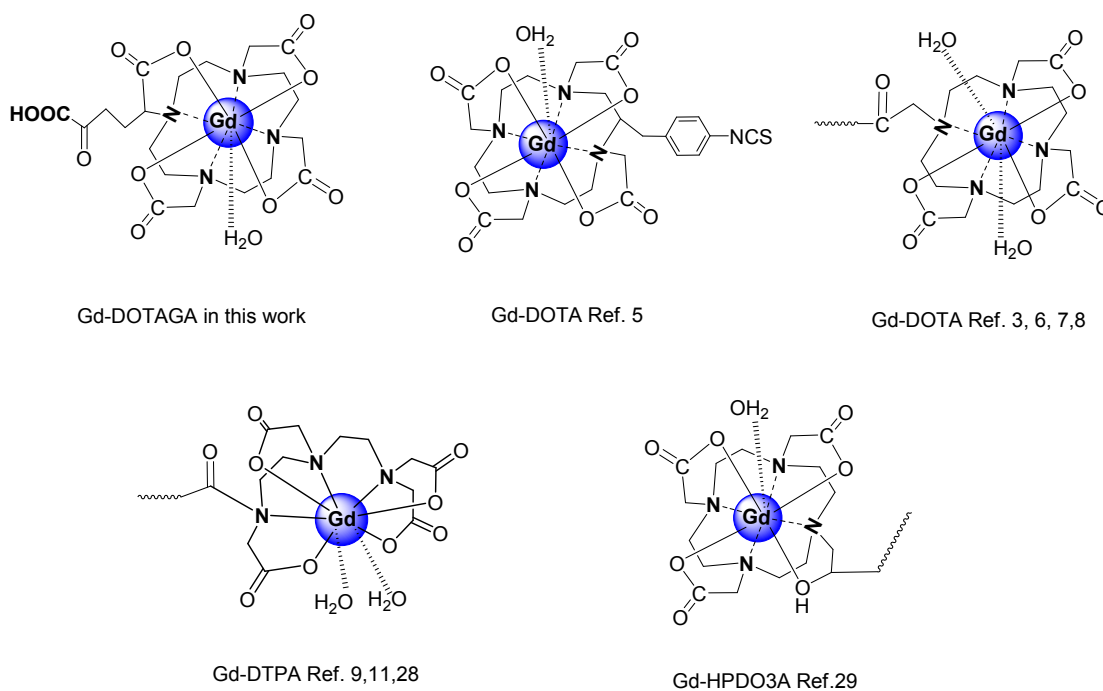

Figure S7. The molecular structures of the Gd-complexes cited in the manuscript.
